# Supplementary material for: Heterogeneity in District-Level Transmission of Ebola Virus Disease during the 2013-2015 Epidemic in West Africa
Source: PLoS Negl Trop Dis. 2016 Jul 19;10(7):e0004867. doi: 10.1371/journal.pntd.0004867 (PMC4951043; doi:10.1371/journal.pntd.0004867)
Supplement: S1 Table — (XLS) [file pntd.0004867.s005.xls]

## Sheet: Sheet1
Country: District	R0, estimate	R0, lower 95% CI	R0, upper 95% CI
Guinea: National	0.97	0.77	1.18
Guinea: Beyla	1.72	1.05	2.39
Guinea: Boffa	0.57	0.29	0.85
Guinea: Boké	1.52	0.77	2.27
Guinea: Conakry	1.15	0.8	1.51
Guinea: Coyah	1.44	0.76	2.13
Guinea: Dabola	0.44	0.04	0.85
Guinea: Dalaba	0.58	0.18	0.98
Guinea: Dubréka	0.36	0.12	0.6
Guinea: Faranah	1.21	0.88	1.54
Guinea: Forécariah	0.73	0.35	1.11
Guinea: Fria	0.78	0.35	1.22
Guinea: Guéckédou	1.45	0.97	1.93
Guinea: Kankan	1.39	0.68	2.09
Guinea: Kindia	1.6	0.96	2.25
Guinea: Kissidougou	0.46	0.06	0.86
Guinea: Kouroussa	0.78	0.39	1.16
Guinea: Kérouané	1.59	1.18	1.99
Guinea: Lola	0.91	0.57	1.25
Guinea: Macenta	1.05	0.62	1.48
Guinea: Mali	0.66	0.17	1.16
Guinea: Nzérékoré	1.56	1.13	1.99
Guinea: Pita	0.53	0.12	0.95
Guinea: Siguiri	0.44	0.05	0.82
Guinea: Télimélé	0.93	0.57	1.29
Guinea: Yomou	0.47	0.13	0.8
Liberia: National	1.26	0.98	1.55
Liberia: Bomi	1.94	1.43	2.46
Liberia: Bong	1.68	1.18	2.18
Liberia: Gbarpolu	1.72	0.95	2.49
Liberia: Grand Bassa	1.67	1.16	2.17
Liberia: Grand Cape Mount	1.81	1.18	2.44
Liberia: Grand Gedeh	0.7	0.17	1.24
Liberia: Grand Kru	0.86	0.45	1.27
Liberia: Lofa	0.84	0.32	1.36
Liberia: Margibi	3.37	2.46	4.27
Liberia: Maryland	0.53	0.1	0.96
Liberia: Montserrado	2.07	1.41	2.74
Liberia: Nimba	2.06	1.54	2.59
Liberia: River Cess	0.63	0.2	1.06
Liberia: River Gee	1.14	0.57	1.7
Liberia: Sinoe	1.74	1.05	2.42
Sierra Leone: National	1.66	1.32	2
Sierra Leone: Bo	1.91	1.33	2.49
Sierra Leone: Bombali	1.54	0.86	2.23
Sierra Leone: Kailahun	1.35	1.04	1.67
Sierra Leone: Kambia	1.3	0.91	1.7
Sierra Leone: Kenema	1.65	1.27	2.03
Sierra Leone: Koinadugu	1.14	0.84	1.45
Sierra Leone: Kono	1.22	0.59	1.85
Sierra Leone: Moyamba	2.18	1.37	2.98
Sierra Leone: Port Loko	1.4	0.83	1.98
Sierra Leone: Pujehun	1.5	1.03	1.98
Sierra Leone: Tonkolili	2.54	1.99	3.08
Sierra Leone: Western Rural	2.73	1.91	3.55
Sierra Leone: Western Urban	1.43	0.86	2
